# Supplementary material
Source: Research Square preprint supplement (doi:10.21203/rs.3.rs-9581778/v1)
Supplement: Supplementary file 1 [file 5170877fb0722a491368326c.xlsx]

## Sheet: CODEBOOK
AI Disclosure Policies Corpus - Codebook
Companion supplementary file to: "AI Disclosure Without Protection: A Governance Gap in Scholarly Peer Review"
License: CC BY 4.0 (https://creativecommons.org/licenses/by/4.0/)
Suggested citation: Li, G. X. (2026). AI Disclosure Policies Corpus v4 [Dataset]. Companion to "AI Disclosure Without Protection".
Scope:	15 official policy documents from 10 major scholarly publishers and AI conference venues.
Coverage:	10 organizations, 15 documents. Two documents each from ACM, Elsevier, FAccT, ICLR 2026, and Wiley; one document each from AIES 2025, COPE, NeurIPS, Springer Nature, and Taylor & Francis.
Date accessed:	2026-04-16 (all sources re-verified live in April 2026).
SHEETS IN THIS FILE
Sheet	Rows	Purpose
CODEBOOK	-	This sheet. Variable definitions and controlled vocabularies.
MASTER	15	One row per policy document. Coded variables for all 30 fields below.
QUOTES	46	Direct quotes from policy text, tied to specific variables. Provides the textual evidence behind each MASTER cell.
MASTER SHEET - VARIABLE DEFINITIONS
Column	Type	Definition	Allowed values / format
organization_name	text	Publisher, conference, or organisation that issues the policy.	Free text. Examples: ACM; Elsevier; ICLR 2026.
document_title	text	Exact title of the policy document.	Free text.
document_type	categorical	Genre of the source document.	authorship_policy | author_guidelines | peer_review_policy | reviewer_guidelines | editorial_policy | ethics_statement | submission_guidelines | CFP
official_url	text	Live URL of the source document at the date accessed.	Valid URL.
date_accessed	date	Date the document was retrieved or re-verified.	YYYY-MM-DD. All entries: 2026-04-16.
policy_level	categorical	Whether the issuer is a publisher, a conference, or an umbrella organisation.	publisher | conference | organization
applies_to_authors	categorical	Whether the document binds authors.	yes | no
applies_to_reviewers	categorical	Whether the document binds reviewers.	yes | no
disclosure_required	categorical	Whether the document requires authors to disclose AI use.	yes | no | unclear
disclosure_scope_summary	text	Short prose summary of what must be disclosed and at what threshold.	Free text.
grammar_or_spellcheck_exempt	categorical	Whether the policy explicitly exempts grammar or spellcheck tools from disclosure.	yes | no | unclear
ai_cannot_be_author	categorical	Whether the policy bars AI tools from authorship.	yes | no | unclear
human_responsibility_emphasized	categorical	Whether the policy states that human authors retain full responsibility for AI-assisted content.	yes (only value present in corpus)
disclosure_location	text	Where in the manuscript the disclosure must appear.	Free text. Examples: "Acknowledgements section"; "Methods"; "not specified".
disclosure_visibility	categorical	Who sees the disclosure.	public | editors | unclear
reviewer_guidance_on_interpreting_disclosure	categorical	Whether the policy gives reviewers explicit guidance on how to interpret an authors AI disclosure.	yes | no
explicit_anti_bias_or_non_penalization_language	categorical	Whether the policy explicitly states that disclosed AI use is not grounds for rejection or unfavourable evaluation.	yes | no
anti_bias_scope	categorical	If anti-bias language is present, what it covers.	direct_author_disclosure | indirect_methodology | none
appeal_or_complaint_mechanism_for_ai_related_evaluation	categorical	Whether an AI-specific appeal or complaint channel exists for evaluation disputes.	yes | no (only "no" present in corpus)
source_authority	categorical	Type of document by formality and binding force.	formal_policy | author_guide | reviewer_guide | submission_guidelines | ethics_statement | CFP
policy_year_or_version	text	Version year or last-updated date as stated by the issuer.	Free text.
reviewer_ai_tool_use_policy	categorical	How the policy treats reviewers own use of AI tools.	allowed_with_conditions | allowed_with_mandatory_disclosure | prohibited | not_addressed
evidence_status_reviewer_guidance	categorical	Coding evidence for reviewer guidance on interpretation.	explicit_yes | not_found_in_reviewed_document
evidence_status_anti_bias	categorical	Coding evidence for anti-bias / non-penalisation language.	explicit_yes | not_found_in_reviewed_document
evidence_status_appeal	categorical	Coding evidence for AI-specific appeal mechanisms.	not_found_in_reviewed_document (only value present in corpus)
notes	text	Coder notes on edge cases, scope limits, or cross-document context.	Free text.
key_quote_1	text	Most representative direct quote supporting the coding of this row. Verbatim from source.	Free text. Verbatim only.
key_quote_2	text	Secondary supporting quote when one quote is insufficient. Optional.	Free text. Verbatim only.
short_policy_summary	text	One-paragraph plain-language summary of what the document says.	Free text.
notes_on_missing_safeguards	text	Notes describing what reviewer-side safeguards are absent in this document.	Free text.
QUOTES SHEET - VARIABLE DEFINITIONS
Column	Type	Definition	Allowed values / format
organization_name	text	Issuer of the source document. Matches MASTER.organization_name.	Free text.
document_title	text	Source document title. Matches MASTER.document_title.	Free text.
variable_name	text	Which MASTER variable this quote supports as evidence.	Must match a MASTER column name.
exact_quote	text	Verbatim quote from the source document. No paraphrase.	Free text. Verbatim only.
official_url	text	Live URL of the source document.	Valid URL.
CODING NOTES
Two-stage verification:	All 15 documents were independently re-verified against live official sources in April 2026. Four high-stakes cases (Wiley, AIES 2025, FAccT, ICLR 2026) were spot-checked against source documents because they matter most for the central claim about safeguard presence or absence.
Scope of the corpus:	The corpus is bounded, not exhaustive. It targets the most influential publishers and AI venues whose policies shape current norms. Documents outside this set may exist with different practices.
"Unclear" coding:	Used when the policy text is ambiguous or silent on a binary question. Not a residual category for missing data.
"not_found_in_reviewed_document":	Means the variable was searched for in the cited document and not located. Does not claim the issuer has no such policy elsewhere.

## Sheet: MASTER
organization_name	document_title	document_type	official_url	date_accessed	policy_level	applies_to_authors	applies_to_reviewers	disclosure_required	disclosure_scope_summary	grammar_or_spellcheck_exempt	ai_cannot_be_author	human_responsibility_emphasized	disclosure_location	disclosure_visibility	reviewer_guidance_on_interpreting_disclosure	explicit_anti_bias_or_non_penalization_language	anti_bias_scope	appeal_or_complaint_mechanism_for_ai_related_evaluation	source_authority	policy_year_or_version	reviewer_ai_tool_use_policy	evidence_status_reviewer_guidance	evidence_status_anti_bias	evidence_status_appeal	notes	key_quote_1	key_quote_2	short_policy_summary	notes_on_missing_safeguards
ACM	ACM Policy on Authorship	authorship_policy	https://www.acm.org/publications/policies/new-acm-policy-on-authorship	2026-04-16	publisher	yes	no	yes	Authors must fully disclose any use of generative AI tools (e.g., ChatGPT) in the work. Basic spelling/grammar tools are exempt.	yes	yes	yes	Acknowledgements section	public	no	no	none	no	formal_policy	2025 (updated September 16, 2025)	not_addressed	not_found_in_reviewed_document	not_found_in_reviewed_document	not_found_in_reviewed_document	Authorship policy only; reviewer AI use is addressed in the separate Peer Review Policy. No guidance on how reviewers should interpret author AI disclosures.	Generative AI tools and technologies, such as ChatGPT, may not be listed as authors of an ACM published Work. The use of generative AI tools and technologies to create content is permitted but must be fully disclosed in the Work.	Basic word processing systems that recommend and insert replacement text, perform spelling or grammar checks and corrections, or systems that do language translations are to be considered exceptions to this disclosure requirement.	AI cannot be listed as author; AI use must be disclosed in Acknowledgements; grammar/spellcheck tools are exempt; authors bear full responsibility.	No reviewer-side guidance on interpreting disclosures; no anti-bias language; no appeal mechanism for AI-related evaluation disputes.
ACM	ACM Peer Review Policy	peer_review_policy	https://www.acm.org/publications/policies/peer-review	2026-04-16	publisher	yes	yes	unclear	Reviewers may use AI only to improve readability of reports, provided all confidential content is removed first. Uploading submissions to third-party LLMs is prohibited.	unclear	no	yes	not specified	editors	no	no	none	no	formal_policy	2023 (approved November 30, 2023)	allowed_with_conditions	not_found_in_reviewed_document	not_found_in_reviewed_document	not_found_in_reviewed_document	Reviewer AI use is conditionally allowed for improving report readability only, with confidential content removed. No guidance on interpreting author AI disclosures. Bias-free review is required generally (nationality, gender, etc.) but not specifically for AI disclosure.	Reviewers may use generative AI or other third-party tools with the sole purpose of improving the quality and readability of reviewer reports for the author, provided any and all parts of the review that would potentially identify the submission, author identities, reviewer identity, or other confidential content is removed prior to uploading into third party tools.	ACM requires that the peer review process and related decisions be free of bias based on nationality, religious or political beliefs, gender or other demographic characteristics, personal or professional conflicts or competing interests.	Reviewer AI use conditionally allowed for report readability only; uploading submissions to LLMs prohibited; general bias-free review required but no specific guidance on AI disclosure interpretation.	General anti-bias language exists but does not specifically address reviewer bias against authors who disclose AI use. No appeal mechanism for AI-related evaluation disputes.
Elsevier	Generative AI policies for journals	author_guidelines	https://www.elsevier.com/about/policies-and-standards/generative-ai-policies-for-journals	2026-04-16	publisher	yes	no	yes	Authors must disclose AI tool use in a separate AI declaration statement upon submission. Basic grammar/spelling checks are exempt. AI use in research process must be declared in the methods section.	yes	yes	yes	Separate AI declaration statement (appears in published work); methods section for AI used in research process	public	no	no	none	no	formal_policy	unclear	not_addressed	not_found_in_reviewed_document	not_found_in_reviewed_document	not_found_in_reviewed_document	Author-focused policy only. Reviewer AI use is addressed in a separate document. No guidance on how reviewers should interpret or weigh author AI disclosures.	Authors should disclose the use of AI Tools for manuscript preparation in a separate AI declaration statement in their manuscript upon submission and a statement will appear in the published work.	Authors should not list AI Tools as an author or co-author, nor cite AI Tools as an author. Authorship implies responsibilities and tasks that can only be attributed to and performed by humans.	AI use must be disclosed in a separate statement visible in the published article; grammar/spelling exempt; AI cannot be author; authors bear full responsibility.	No reviewer-side guidance on interpreting disclosures; no anti-bias language; no appeal mechanism.
Elsevier	The use of generative AI and AI-assisted technologies in the review process	reviewer_guidelines	https://www.elsevier.com/about/policies-and-standards/the-use-of-generative-ai-and-ai-assisted-technologies-in-the-review-process	2026-04-16	publisher	no	yes	unclear	Reviewers must not upload manuscripts or any related communications into generative AI tools, even for language improvement. Critical thinking and original assessment must be human.	no	no	yes	not applicable	editors	no	no	none	no	formal_policy	unclear	prohibited	not_found_in_reviewed_document	not_found_in_reviewed_document	not_found_in_reviewed_document	Strict prohibition on reviewer AI use, even for language improvement, due to confidentiality risks. No guidance on how reviewers should interpret author AI disclosures. Grammar exemption explicitly denied for reviewers.	Reviewers should not upload the material/manuscript or any part thereof into a generative AI tool as this may violate Elsevier's and/or the authors' confidentiality and proprietary rights and, where the material/manuscript contains personally identifiable information, may breach data privacy rights.	For this reason, reviewers should not upload their communications or any related material into an AI tool, even if it is just for the purpose of improving language and readability.	Reviewers are strictly prohibited from using any generative AI tool on manuscripts or review communications due to confidentiality; reviewer is fully accountable for review content.	No guidance on how reviewers should interpret author AI disclosures; no anti-bias language; no appeal mechanism.
Springer Nature	Artificial Intelligence (AI) — Nature Portfolio Editorial Policies	editorial_policy	https://www.nature.com/nature-portfolio/editorial-policies/ai	2026-04-16	publisher	yes	yes	yes	Authors must document LLM use in the Methods section. AI-assisted copy editing (grammar, spelling, punctuation, tone) is exempt. Reviewers must not upload manuscripts to generative AI tools; must declare if AI supported their evaluation.	yes	yes	yes	Methods section (or suitable alternative); peer review report (for reviewers)	public	no	no	none	no	formal_policy	unclear	allowed_with_conditions	not_found_in_reviewed_document	not_found_in_reviewed_document	not_found_in_reviewed_document	Nature Portfolio detailed policy. SN umbrella policy at https://www.springernature.com/gp/policies/editorial-policies/ confirms same rules apply across all SN brands (BMC, Palgrave, Springer, etc.). Single document covers both authors and reviewers. Reviewers may not upload manuscripts but must declare if AI supported evaluation.	If any part of the evaluation of the claims made in the manuscript was in any way supported by an AI tool, we ask peer reviewers to declare the use of such tools transparently in the peer review report.	LLMs, such as ChatGPT, do not currently satisfy our authorship criteria. Notably an attribution of authorship carries with it accountability for the work, which cannot be effectively applied to LLMs.	LLM use must be declared in Methods; copy-editing AI exempt; AI cannot be author; reviewers must not upload manuscripts but must declare AI-supported evaluation.	No reviewer guidance on interpreting author AI disclosures; no anti-bias language; no appeal mechanism.
Wiley	AI guidelines for researchers	author_guidelines	https://www.wiley.com/en-nl/publish/article/ai-guidelines/	2026-04-16	publisher	yes	yes	yes	Authors must disclose AI tool use upon submission. Reviewers must not upload unpublished manuscripts to AI tools; must disclose AI use in review reports. Explicit non-rejection language: AI use in manuscript development is not grounds for rejection.	yes	yes	yes	Submission form; review report (for reviewers)	editors	yes	yes	direct_author_disclosure	no	author_guide	2025 (October 2025 update)	allowed_with_conditions	explicit_yes	explicit_yes	not_found_in_reviewed_document	Strongest reviewer-side safeguard in the corpus. Explicitly states AI use in manuscript development is not grounds for rejection. Instructs editors/reviewers to focus on research quality, integrity, disclosure, and clarity regardless of AI use. Grammar exemption CONFIRMED: "Simple grammar correction, formatting, and word choice suggestions typically do not require disclosure." (Wiley AI guideline…	At Wiley, AI use in manuscript development is not grounds for rejection. Editorial evaluation should focus on the quality, integrity, disclosure, and clarity of communication in the research, regardless of the Technologies used to support manuscript development.	If you are reviewing a manuscript as a peer reviewer or journal editor: Do not upload any portion of submitted manuscripts, as these are confidential to the peer review process	Authors must disclose AI use; reviewers must not upload manuscripts to AI but must declare AI use in reports; explicit non-rejection language for disclosed AI use; human accountability emphasized.	No explicit appeal mechanism for AI-related evaluation disputes. Grammar/spellcheck exemption not explicitly stated in reviewed text.
Wiley	Best practice guidelines on research integrity and publishing ethics	ethics_statement	https://onlinelibrary.wiley.com/publishing-policies	2026-04-16	publisher	yes	yes	yes	Overarching ethics framework that the AI guidelines augment. Requires transparency in publishing and integrity in peer review.	unclear	unclear	yes	per journal instructions	unclear	no	no	none	no	ethics_statement	unclear	not_addressed	not_found_in_reviewed_document	not_found_in_reviewed_document	not_found_in_reviewed_document	Overarching ethics framework referenced by the AI guidelines. AI-specific content is minimal; primary AI guidance is in the AI guidelines document. Retained as the authoritative ethics anchor document.	Transparency is essential to Wiley's commitment to integrity in publishing.	These guidelines augment Wiley's Best practice guidelines on research integrity and publishing ethics and will evolve as technology and author needs advance.	Overarching ethics framework; AI-specific content is minimal and deferred to the AI guidelines document.	No AI-specific reviewer guidance; no anti-bias language; no appeal mechanism.
Taylor & Francis	AI Policy	editorial_policy	https://taylorandfrancis.com/our-policies/ai-policy/	2026-04-16	publisher	yes	yes	yes	Authors must acknowledge AI use with tool name, version, purpose, and reason in Methods or Acknowledgments. Reviewers and editors must not upload manuscripts or any information from them into generative AI tools.	unclear	yes	yes	Methods or Acknowledgments section	public	no	no	none	no	formal_policy	unclear	prohibited	not_found_in_reviewed_document	not_found_in_reviewed_document	not_found_in_reviewed_document	Reviewers and editors strictly prohibited from uploading manuscripts to AI tools. No guidance on how reviewers should interpret author AI disclosures. Grammar/spellcheck exemption not explicitly stated for authors in the reviewed text.	Editors and peer reviewers must not upload files, images or information from unpublished manuscripts into Generative AI tools. Failure to comply with this policy may infringe upon the rightsholder's intellectual property.	Generative AI tools must not be listed as an author, because such tools are unable to assume responsibility for the submitted content or manage copyright and licensing agreements.	Authors must disclose AI use in Methods or Acknowledgments; AI cannot be author; reviewers and editors strictly prohibited from uploading manuscripts to AI tools.	No reviewer guidance on interpreting author AI disclosures; no anti-bias language; no appeal mechanism.
COPE	Authorship and AI tools	ethics_statement	https://publicationethics.org/guidance/cope-position/authorship-and-ai-tools	2026-04-16	organization	yes	no	yes	Authors who use AI tools in writing, image production, or data collection/analysis must disclose in Materials and Methods (or similar section) how and which tool was used.	unclear	yes	yes	Materials and Methods (or similar section)	public	no	no	none	no	ethics_statement	Last reviewed 13 February 2023	not_addressed	not_found_in_reviewed_document	not_found_in_reviewed_document	not_found_in_reviewed_document	COPE position statement is brief and focused on authorship and author disclosure only. Reviewer AI use is not addressed in this document. Grammar/spellcheck exemption not explicitly stated. COPE's broader AI-in-peer-review discussion documents are not formal policy statements and are excluded per corpus stopping rules.	AI tools cannot be listed as an author of a paper. AI tools cannot meet the requirements for authorship as they cannot take responsibility for the submitted work. As non-legal entities, they cannot assert the presence or absence of conflicts of interest nor manage copyright and license agreements.	Authors who use AI tools in the writing of a manuscript, production of images or graphical elements of the paper, or in the collection and analysis of data, must be transparent in disclosing in the Materials and Methods (or similar section) of the paper how the AI tool was used and which tool was used.	AI cannot be author; authors must disclose AI use in Materials and Methods; authors are fully responsible for content even when AI was used.	No reviewer-side guidance; no anti-bias language; no appeal mechanism. COPE's broader guidance on AI in peer review exists in separate discussion documents not included in this bounded corpus.
ICLR 2026	ICLR 2026 Author Guide	author_guidelines	https://iclr.cc/Conferences/2026/AuthorGuide	2026-04-16	conference	yes	no	yes	If LLMs played a significant role in research ideation and/or writing, authors must describe the precise role in a separate LLM usage section (appendix). Not disclosing significant LLM usage can lead to desk rejection.	unclear	yes	yes	Separate LLM usage section in appendix	public	no	no	none	no	formal_policy	2025 (for ICLR 2026 cycle)	not_addressed	not_found_in_reviewed_document	not_found_in_reviewed_document	not_found_in_reviewed_document	Official iclr.cc page (not a blog post). Disclosure is required only when LLMs played a significant role; threshold-based. Failure to disclose can lead to desk rejection. Grammar/spellcheck exemption not explicitly stated.	However, new this year, if LLMs played a significant role in research ideation and/or writing to the extent that they could be regarded as a contributor, then authors should describe the precise role of the LLM in a separate section on LLM usage. This section can appear in the appendix, and will not be considered as part of the page limit.	Not disclosing significant LLM usage can lead to desk rejection of the paper.	LLM disclosure required when LLMs played a significant role in ideation or writing; placed in appendix; non-disclosure can lead to desk rejection.	No reviewer guidance on interpreting author LLM disclosures; no anti-bias language; no appeal mechanism. Grammar/spellcheck exemption not explicitly stated.
ICLR 2026	ICLR 2026 Reviewer Guide	reviewer_guidelines	https://iclr.cc/Conferences/2026/ReviewerGuide	2026-04-16	conference	no	yes	yes	Reviewers must disclose LLM use in their reviews via a dedicated field in the review form. LLMs are allowed as writing assistance tools but reviewers take full responsibility. Uploading submissions to LLMs violates confidentiality.	unclear	no	yes	Dedicated LLM disclosure field in review form	editors	yes	no	none	no	formal_policy	2025 (for ICLR 2026 cycle)	allowed_with_mandatory_disclosure	explicit_yes	not_found_in_reviewed_document	not_found_in_reviewed_document	Official iclr.cc page. Reviewers are mandated to disclose LLM use in a dedicated review form field. Reviewer guidance on author LLM disclosure: if undisclosed LLM use is found, notify area chair. General bias reminder present but not specific to AI disclosure. Failing to disclose reviewer LLM use may put reviewer's own papers at risk for desk rejection. [v4 CLARIFICATION] reviewer_guidance_on_int…	Just as for authors, new this year, we mandate that reviewers disclose the use of LLMs in their reviews. The review form will include a field to specify how you used LLMs, if at all. Failing to disclose this usage may put the reviewers' papers at risk for desk rejection as well.	Note that new this year, we are asking that authors disclose any significant usage of LLMs in research ideation/writing. If such LLM usage is uncovered during the discussion but not disclosed in the paper writing, please notify the area chair.	Reviewers must disclose LLM use in review form; LLMs allowed as writing assistance; uploading submissions to LLMs prohibited; reviewer notifies area chair if undisclosed author LLM use is found.	reviewer_guidance_on_interpreting_disclosure=yes reflects procedural governance only (area chair notification for undisclosed author LLM use), not a fairness protection for authors who disclose AI use. No anti-bias language specific to AI disclosure. No appeal mechanism.
NeurIPS	NeurIPS 2025 Policy on the Use of Large Language Models	submission_guidelines	https://neurips.cc/Conferences/2025/LLM	2026-04-16	conference	yes	yes	yes	Authors must document LLM use in methodology IF it is an important or non-standard component ("any tool that is important to that methodology...should be described"). Grammar/editing use does not need declaration. Disclosure is conditional on methodological importance, not blanket.	yes	yes	yes	Experimental setup section (or equivalent) for methodology use	public	no	no	none	no	submission_guidelines	2025	allowed_with_conditions	not_found_in_reviewed_document	not_found_in_reviewed_document	not_found_in_reviewed_document	Nuanced reviewer policy: reviewers may use LLMs for concept understanding and review drafting without sharing the paper, but must not share submissions with LLMs. No guidance on how reviewers should interpret author LLM disclosures. [v4 CLARIFICATION] NeurIPS disclosure is CONDITIONAL: "any tool that is important to that methodology, including the use of LLMs, should be described." LLMs used only…	You must keep everything relating to the review process confidential. Do not use ideas, code, or results from the submissions in your own work until they become publicly available. Do not talk about or share submissions with anyone or any LLMs.	You can use resources (e.g. publications on Google Scholar, Wikipedia articles, interactions with LLMs and/or human experts without sharing the paper submissions) to enhance your understanding of certain concepts and to check the grammaticality and phrasing of your written review.	LLM use in methodology must be disclosed; grammar/editing use exempt; AI cannot be author; reviewers may use LLMs for understanding and drafting but must not share submissions.	No reviewer guidance on interpreting author LLM disclosures; no anti-bias language; no appeal mechanism.
FAccT	ACM FAccT 2026 Author Guide	author_guidelines	https://facctconference.org/2026/authorguide.html	2026-04-16	conference	yes	no	yes	All authors must include a 'Generative AI usage statement' in the Endmatter section describing whether and how they used generative AI in writing. This is mandatory for all submissions.	unclear	yes	yes	Endmatter section (mandatory for all submissions)	public	no	no	none	no	author_guide	2026 (last updated March 2026)	not_addressed	not_found_in_reviewed_document	not_found_in_reviewed_document	not_found_in_reviewed_document	Unique in requiring a Generative AI usage statement from ALL authors (not just those who used AI). Violation of ACM AI authorship policy is grounds for desk rejection. Reviewer AI policy is in a separate document.	All authors are expected to include a 'Generative AI usage statement' in the Endmatter section, describing whether and how they used generative AI in writing their publication.	Desk Rejection. Authors who fail to meet the submission requirements will have the papers desk rejected. Specifically, this includes violations of: anonymity, submission length and other formatting requirements, as well as ACM policies, such as the Code of Ethics, AI authorship, concurrent and dual submissions, etc.	All authors must include a Generative AI usage statement in Endmatter; AI authorship violation leads to desk rejection; follows ACM policies.	No reviewer guidance on interpreting disclosures; no anti-bias language; no appeal mechanism. Grammar/spellcheck exemption not explicitly stated.
FAccT	ACM FAccT 2026 Reviewer Guide	reviewer_guidelines	https://facctconference.org/2026/rguide.html	2026-04-16	conference	no	yes	unclear	Reviewers must not use LLMs to write reviews. Reviewers must use best professional judgment. Papers should not be penalized for not using the latest ML/AI models in methodology.	unclear	no	yes	not applicable	editors	no	yes	indirect_methodology	no	reviewer_guide	2026 (last updated January 2026)	prohibited	not_found_in_reviewed_document	explicit_yes	not_found_in_reviewed_document	Anti-bias language is explicit but scope is narrow: it addresses penalization for not using the latest ML/AI models in methodology, NOT for disclosing AI writing assistance. These are analytically distinct. LLM use for writing reviews is explicitly prohibited. SCOPE DISTINCTION (v4 CORRECTION): The non-penalization language ("A paper should also not be penalized for not using the latest ML/AI mod…	FAccT does not allow Reviewers to delegate their reviews to external reviewers or use LLMs to write reviews.	A paper should also not be penalized for not using the latest ML/AI models, especially when the research contributions or the problem the authors try to illustrate do not depend on models being used for experimental purposes.	Reviewers must not use LLMs to write reviews (grammar/fluency checking permitted); papers should not be penalized for not using latest ML/AI models in methodology (methodological scope only, not AI writing disclosure); reviewer must use best professional judgment.	Anti-bias language is about methodology choice (not using latest ML/AI models in experiments), NOT about author AI writing disclosure. No reviewer guidance on interpreting author AI disclosures. No appeal mechanism for AI-related evaluation disputes. [v4] reviewer_guidance_on_interpreting_disclosure corrected from yes to no.
AIES	AIES 2025 Call for Papers	CFP	https://www.aies-conference.com/2025/call-for-papers/	2026-04-16	conference	yes	no	no	PROHIBITION (not disclosure): LLM-generated text is prohibited unless presented as part of the paper's experimental analysis. Editing/polishing author-written text with LLMs is explicitly permitted without any disclosure requirement. No disclosure mechanism exists — the policy bans LLM-generated content rather than requiring it to be declared.	yes	yes	yes	not applicable (prohibition, not disclosure requirement)	unclear	no	no	none	no	CFP	2025	not_addressed	not_found_in_reviewed_document	not_found_in_reviewed_document	not_found_in_reviewed_document	Most restrictive author policy in the corpus: LLM-generated text is PROHIBITED (not just requiring disclosure) unless it is the subject of experimental analysis. Policy mechanism is prohibition, not disclosure. Source is CFP, not a standalone formal policy page; no separate reviewer AI policy found. [v4 CONFIRMED] AIES operates under a PROHIBITION framework, not a disclosure framework. LLM-genera…	Papers that include text generated from large language models (LLMs) such as ChatGPT are prohibited unless the produced text is presented as a part of the paper's experimental analysis.	Note that this policy does not prohibit authors from using LLMs for editing or polishing author-written text.	LLM-generated text prohibited unless it is the subject of experimental analysis; editing/polishing permitted; AI cannot be author or citable source; authors bear full responsibility.	Policy is a prohibition framework, not a disclosure framework. No disclosure mechanism, no reviewer guidance, no anti-bias language, no appeal mechanism. Source is CFP only.

## Sheet: QUOTES
organization_name	document_title	variable_name	exact_quote	official_url
ACM	ACM Policy on Authorship	ai_cannot_be_author	Generative AI tools and technologies, such as ChatGPT, may not be listed as authors of an ACM published Work. The use of generative AI tools and technologies to create content is permitted but must be fully disclosed in the Work.	https://www.acm.org/publications/policies/new-acm-policy-on-authorship
ACM	ACM Policy on Authorship	grammar_or_spellcheck_exempt	Basic word processing systems that recommend and insert replacement text, perform spelling or grammar checks and corrections, or systems that do language translations are to be considered exceptions to this disclosure requirement.	https://www.acm.org/publications/policies/new-acm-policy-on-authorship
ACM	ACM Policy on Authorship	disclosure_location	Acknowledgements section of the Work	https://www.acm.org/publications/policies/new-acm-policy-on-authorship
ACM	ACM Peer Review Policy	reviewer_ai_tool_use_policy	Reviewers may use generative AI or other third-party tools with the sole purpose of improving the quality and readability of reviewer reports for the author, provided any and all parts of the review that would potentially identify the submission, author identities, reviewer identity, or other confidential content is removed prior to uploading into third party tools.	https://www.acm.org/publications/policies/peer-review
ACM	ACM Peer Review Policy	explicit_anti_bias_or_non_penalization_language	ACM requires that the peer review process and related decisions be free of bias based on nationality, religious or political beliefs, gender or other demographic characteristics, personal or professional conflicts or competing interests.	https://www.acm.org/publications/policies/peer-review
Elsevier	Generative AI policies for journals	disclosure_required	Authors should disclose the use of AI Tools for manuscript preparation in a separate AI declaration statement in their manuscript upon submission and a statement will appear in the published work.	https://www.elsevier.com/about/policies-and-standards/generative-ai-policies-for-journals
Elsevier	Generative AI policies for journals	ai_cannot_be_author	Authors should not list AI Tools as an author or co-author, nor cite AI Tools as an author. Authorship implies responsibilities and tasks that can only be attributed to and performed by humans.	https://www.elsevier.com/about/policies-and-standards/generative-ai-policies-for-journals
Elsevier	Generative AI policies for journals	grammar_or_spellcheck_exempt	Basic checks of grammar, spelling and punctuation need no declaration.	https://www.elsevier.com/about/policies-and-standards/generative-ai-policies-for-journals
Elsevier	The use of generative AI and AI-assisted technologies in the review process	reviewer_ai_tool_use_policy	Reviewers should not upload the material/manuscript or any part thereof into a generative AI tool as this may violate Elsevier's and/or the authors' confidentiality and proprietary rights and, where the material/manuscript contains personally identifiable information, may breach data privacy rights.	https://www.elsevier.com/about/policies-and-standards/the-use-of-generative-ai-and-ai-assisted-technologies-in-the-review-process
Elsevier	The use of generative AI and AI-assisted technologies in the review process	reviewer_ai_tool_use_policy	For this reason, reviewers should not upload their communications or any related material into an AI tool, even if it is just for the purpose of improving language and readability.	https://www.elsevier.com/about/policies-and-standards/the-use-of-generative-ai-and-ai-assisted-technologies-in-the-review-process
Elsevier	The use of generative AI and AI-assisted technologies in the review process	human_responsibility_emphasized	Elsevier abides by the highest standards of integrity in the review process which implies responsibilities that can only be attributed to humans. The reviewer is responsible and accountable for the content of the review.	https://www.elsevier.com/about/policies-and-standards/the-use-of-generative-ai-and-ai-assisted-technologies-in-the-review-process
Springer Nature	Artificial Intelligence (AI) — Nature Portfolio Editorial Policies	ai_cannot_be_author	Large Language Models (LLMs), such as ChatGPT, do not currently satisfy our authorship criteria. Notably an attribution of authorship carries with it accountability for the work, which cannot be effectively applied to LLMs.	https://www.nature.com/nature-portfolio/editorial-policies/ai
Springer Nature	Artificial Intelligence (AI) — Nature Portfolio Editorial Policies	grammar_or_spellcheck_exempt	The use of an LLM (or other AI-tool) for 'AI assisted copy editing' purposes does not need to be declared. In this context, we define the term 'AI assisted copy editing' as AI-assisted improvements to human-generated texts for readability and style, and to ensure that the texts are free of errors in grammar, spelling, punctuation and tone.	https://www.nature.com/nature-portfolio/editorial-policies/ai
Springer Nature	Artificial Intelligence (AI) — Nature Portfolio Editorial Policies	reviewer_ai_tool_use_policy	If any part of the evaluation of the claims made in the manuscript was in any way supported by an AI tool, we ask peer reviewers to declare the use of such tools transparently in the peer review report.	https://www.nature.com/nature-portfolio/editorial-policies/ai
Springer Nature	Artificial Intelligence (AI) — Nature Portfolio Editorial Policies	reviewer_ai_tool_use_policy	For these reasons we ask that, while Springer Nature explores providing our peer reviewers with access to safe AI tools, peer reviewers do not upload manuscripts into generative AI tools.	https://www.nature.com/nature-portfolio/editorial-policies/ai
Wiley	AI guidelines for researchers	explicit_anti_bias_or_non_penalization_language	At Wiley, AI use in manuscript development is not grounds for rejection. Editorial evaluation should focus on the quality, integrity, disclosure, and clarity of communication in the research, regardless of the Technologies used to support manuscript development.	https://www.wiley.com/en-nl/publish/article/ai-guidelines/
Wiley	AI guidelines for researchers	reviewer_guidance_on_interpreting_disclosure	Rather than asking 'was AI used here?', the more important questions are: 'Does this manuscript meet the editorial policies of my journal and the expectations of its readers?' and 'Are the disclosures regarding AI use consistent with what's presented in the manuscript?'	https://www.wiley.com/en-nl/publish/article/ai-guidelines/
Wiley	AI guidelines for researchers	reviewer_ai_tool_use_policy	If you are reviewing a manuscript as a peer reviewer or journal editor: Do not upload any portion of submitted manuscripts, as these are confidential to the peer review process	https://www.wiley.com/en-nl/publish/article/ai-guidelines/
Wiley	AI guidelines for researchers	disclosure_required	Authors must disclose the use of AI Technologies when submitting their Material to a Wiley-published journal. If not provided, the journal may request this documentation.	https://www.wiley.com/en-nl/publish/article/ai-guidelines/
Wiley	AI guidelines for researchers	human_responsibility_emphasized	Authors may only use AI Technology as a companion to their writing process, not a replacement. As always, authors must take full responsibility for the accuracy of all content.	https://www.wiley.com/en-nl/publish/article/ai-guidelines/
Taylor & Francis	AI Policy	reviewer_ai_tool_use_policy	Editors and peer reviewers must not upload files, images or information from unpublished manuscripts into Generative AI tools. Failure to comply with this policy may infringe upon the rightsholder's intellectual property.	https://taylorandfrancis.com/our-policies/ai-policy/
Taylor & Francis	AI Policy	ai_cannot_be_author	Generative AI tools must not be listed as an author, because such tools are unable to assume responsibility for the submitted content or manage copyright and licensing agreements.	https://taylorandfrancis.com/our-policies/ai-policy/
Taylor & Francis	AI Policy	disclosure_required	Authors must clearly acknowledge within the article or book any use of Generative AI tools through a statement which includes: the full name of the tool used (with version number), how it was used, and the reason for use. For article submissions, this statement must be included in the Methods or Acknowledgments section.	https://taylorandfrancis.com/our-policies/ai-policy/
COPE	Authorship and AI tools	ai_cannot_be_author	AI tools cannot be listed as an author of a paper. AI tools cannot meet the requirements for authorship as they cannot take responsibility for the submitted work. As non-legal entities, they cannot assert the presence or absence of conflicts of interest nor manage copyright and license agreements.	https://publicationethics.org/guidance/cope-position/authorship-and-ai-tools
COPE	Authorship and AI tools	disclosure_required	Authors who use AI tools in the writing of a manuscript, production of images or graphical elements of the paper, or in the collection and analysis of data, must be transparent in disclosing in the Materials and Methods (or similar section) of the paper how the AI tool was used and which tool was used.	https://publicationethics.org/guidance/cope-position/authorship-and-ai-tools
COPE	Authorship and AI tools	human_responsibility_emphasized	Authors are fully responsible for the content of their manuscript, even those parts produced by an AI tool, and are thus liable for any breach of publication ethics.	https://publicationethics.org/guidance/cope-position/authorship-and-ai-tools
ICLR 2026	ICLR 2026 Author Guide	disclosure_required	However, new this year, if LLMs played a significant role in research ideation and/or writing to the extent that they could be regarded as a contributor, then authors should describe the precise role of the LLM in a separate section on LLM usage. This section can appear in the appendix, and will not be considered as part of the page limit.	https://iclr.cc/Conferences/2026/AuthorGuide
ICLR 2026	ICLR 2026 Author Guide	disclosure_required	Not disclosing significant LLM usage can lead to desk rejection of the paper.	https://iclr.cc/Conferences/2026/AuthorGuide
ICLR 2026	ICLR 2026 Reviewer Guide	reviewer_ai_tool_use_policy	The use of LLMs is allowed as a general-purpose writing assistance tool. However, reviewers should understand that they take full responsibility for the contents written under their name, including content generated by LLMs that could be construed as plagiarism, scientific misconduct, or low quality (e.g., fabrication of facts).	https://iclr.cc/Conferences/2026/ReviewerGuide
ICLR 2026	ICLR 2026 Reviewer Guide	reviewer_ai_tool_use_policy	Just as for authors, new this year, we mandate that reviewers disclose the use of LLMs in their reviews. The review form will include a field to specify how you used LLMs, if at all. Failing to disclose this usage may put the reviewers' papers at risk for desk rejection as well.	https://iclr.cc/Conferences/2026/ReviewerGuide
ICLR 2026	ICLR 2026 Reviewer Guide	reviewer_guidance_on_interpreting_disclosure	Note that new this year, we are asking that authors disclose any significant usage of LLMs in research ideation/writing. If such LLM usage is uncovered during the discussion but not disclosed in the paper writing, please notify the area chair.	https://iclr.cc/Conferences/2026/ReviewerGuide
ICLR 2026	ICLR 2026 Reviewer Guide	explicit_anti_bias_or_non_penalization_language	Be mindful of potential biases and try to be open-minded about the value and interest a paper can hold for the entire ICLR community, even if it may not be very interesting for you.	https://iclr.cc/Conferences/2026/ReviewerGuide
NeurIPS	NeurIPS 2025 Policy on the Use of Large Language Models	reviewer_ai_tool_use_policy	You must keep everything relating to the review process confidential. Do not use ideas, code, or results from the submissions in your own work until they become publicly available. Do not talk about or share submissions with anyone or any LLMs.	https://neurips.cc/Conferences/2025/LLM
NeurIPS	NeurIPS 2025 Policy on the Use of Large Language Models	reviewer_ai_tool_use_policy	You can use resources (e.g. publications on Google Scholar, Wikipedia articles, interactions with LLMs and/or human experts without sharing the paper submissions) to enhance your understanding of certain concepts and to check the grammaticality and phrasing of your written review.	https://neurips.cc/Conferences/2025/LLM
NeurIPS	NeurIPS 2025 Policy on the Use of Large Language Models	grammar_or_spellcheck_exempt	The use of spell checkers and grammar suggestions, programming aid for editing purposes does not need to be documented.	https://neurips.cc/Conferences/2025/LLM
NeurIPS	NeurIPS 2025 Policy on the Use of Large Language Models	ai_cannot_be_author	No. Only humans are eligible to be authors. You, as an author, are fully responsible for all the content in your paper, including text, figures, and methodology, regardless of what tools (e.g., LLMs) you have used.	https://neurips.cc/Conferences/2025/LLM
FAccT	ACM FAccT 2026 Author Guide	disclosure_required	All authors are expected to include a 'Generative AI usage statement' in the Endmatter section, describing whether and how they used generative AI in writing their publication.	https://facctconference.org/2026/authorguide.html
FAccT	ACM FAccT 2026 Author Guide	disclosure_required	Desk Rejection. Authors who fail to meet the submission requirements will have the papers desk rejected. Specifically, this includes violations of: anonymity, submission length and other formatting requirements, as well as ACM policies, such as the Code of Ethics, AI authorship, concurrent and dual submissions, etc.	https://facctconference.org/2026/authorguide.html
FAccT	ACM FAccT 2026 Reviewer Guide	reviewer_ai_tool_use_policy	FAccT does not allow Reviewers to delegate their reviews to external reviewers or use LLMs to write reviews.	https://facctconference.org/2026/rguide.html
FAccT	ACM FAccT 2026 Reviewer Guide	explicit_anti_bias_or_non_penalization_language	A paper should also not be penalized for not using the latest ML/AI models, especially when the research contributions or the problem the authors try to illustrate do not depend on models being used for experimental purposes.	https://facctconference.org/2026/rguide.html
FAccT	ACM FAccT 2026 Reviewer Guide	human_responsibility_emphasized	Reviewers are expected to use their best professional judgment when evaluating papers.	https://facctconference.org/2026/rguide.html
AIES	AIES 2025 Call for Papers	disclosure_required	Papers that include text generated from large language models (LLMs) such as ChatGPT are prohibited unless the produced text is presented as a part of the paper's experimental analysis.	https://www.aies-conference.com/2025/call-for-papers/
AIES	AIES 2025 Call for Papers	grammar_or_spellcheck_exempt	Note that this policy does not prohibit authors from using LLMs for editing or polishing author-written text.	https://www.aies-conference.com/2025/call-for-papers/
AIES	AIES 2025 Call for Papers	ai_cannot_be_author	LLMs may not be cited as a reference in papers. LLMs may not be listed as an author on papers.	https://www.aies-conference.com/2025/call-for-papers/
Wiley	AI guidelines for researchers	grammar_or_spellcheck_exempt	Simple grammar correction, formatting, and word choice suggestions typically do not require disclosure. The table below illustrates how these criteria apply to common AI use scenarios for manuscript development. These examples demonstrate the distinction between AI assistance that creates or transforms content (requiring disclosure) versus AI that polishes existing work (typically no disclosure n…	https://www.wiley.com/en-nl/publish/article/ai-guidelines/
FAccT	ACM FAccT 2026 Reviewer Guide	reviewer_guidance_on_interpreting_disclosure	[v4 CORRECTION: field changed to no] No quote found for reviewer guidance on interpreting author AI disclosures. The guide prohibits LLM use for writing reviews and permits grammar/fluency checking, but provides no guidance on how reviewers should evaluate author AI disclosures.	https://facctconference.org/2026/rguide.html
